# Supplementary material for: Signal-off impedimetric immunosensor for the detection of Escherichia coli O157:H7
Source: PubMed Central journal article supplement (PMC4726323; doi:10.1038/srep19806), 2016-01-22
Supplement: srep19806-s1.pdf [file srep19806-s1.pdf]

# Signal-off impedimetric immunosensor for the detection of

## *Escherichia coli* O157:H7

Jingzhuan Wan<sup>1</sup>, Junjie Ai<sup>1</sup>, Yonghua Zhang<sup>1</sup>, Xiaohui Geng<sup>1</sup>, Qiang Gao<sup>1\*</sup>, Zhiliang Cheng<sup>2\*</sup>

<sup>1</sup>Key Laboratory of Applied Surface and Colloid Chemistry, Ministry of Education, School of Chemistry and Chemical Engineering, Shaanxi Normal University, Xi'an, 710062, China, <sup>2</sup>Department of Bioengineering, University of Pennsylvania, Philadelphia, PA 19104, USA

### **Corresponding Author**

\*Qiang Gao

Tel: 86-29-81530726

Fax: 86-29-81530727

E-mail: [gaoqiang@snnu.edu.cn](mailto:gaoqiang@snnu.edu.cn)

\*Zhiliang Cheng

Tel: 215-573-0290

Fax: 215-573-2071

Email: [zcheng@seas.upenn.edu](mailto:zcheng@seas.upenn.edu)

## Methods

### Preparation of complex AuNPs/bacteria

Bacteria medium (1 ml) containing different amounts of bacterial,  $1 \times 10^6$ ,  $1 \times 10^5$ ,  $1 \times 10^4$  and  $1 \times 10^3$  cfu, was centrifuged at 5000 rpm for 3 minutes, and then removed supernatant. Precipitation was washed with water for three times. The precipitation was then resuspended in water (1 mL). To form the complex AuNPs /bacteria, the resulting bacterial solution (50  $\mu$ L) was mixed with AuNPs solution (500  $\mu$ L, 8 nM) and incubated for 1 h, followed with centrifugation at 3000 rpm for 5 minutes. Precipitation was washed with phosphate buffer solution for three times and resuspended in water (1 mL). The resulting solution of the complex was used for TEM images.

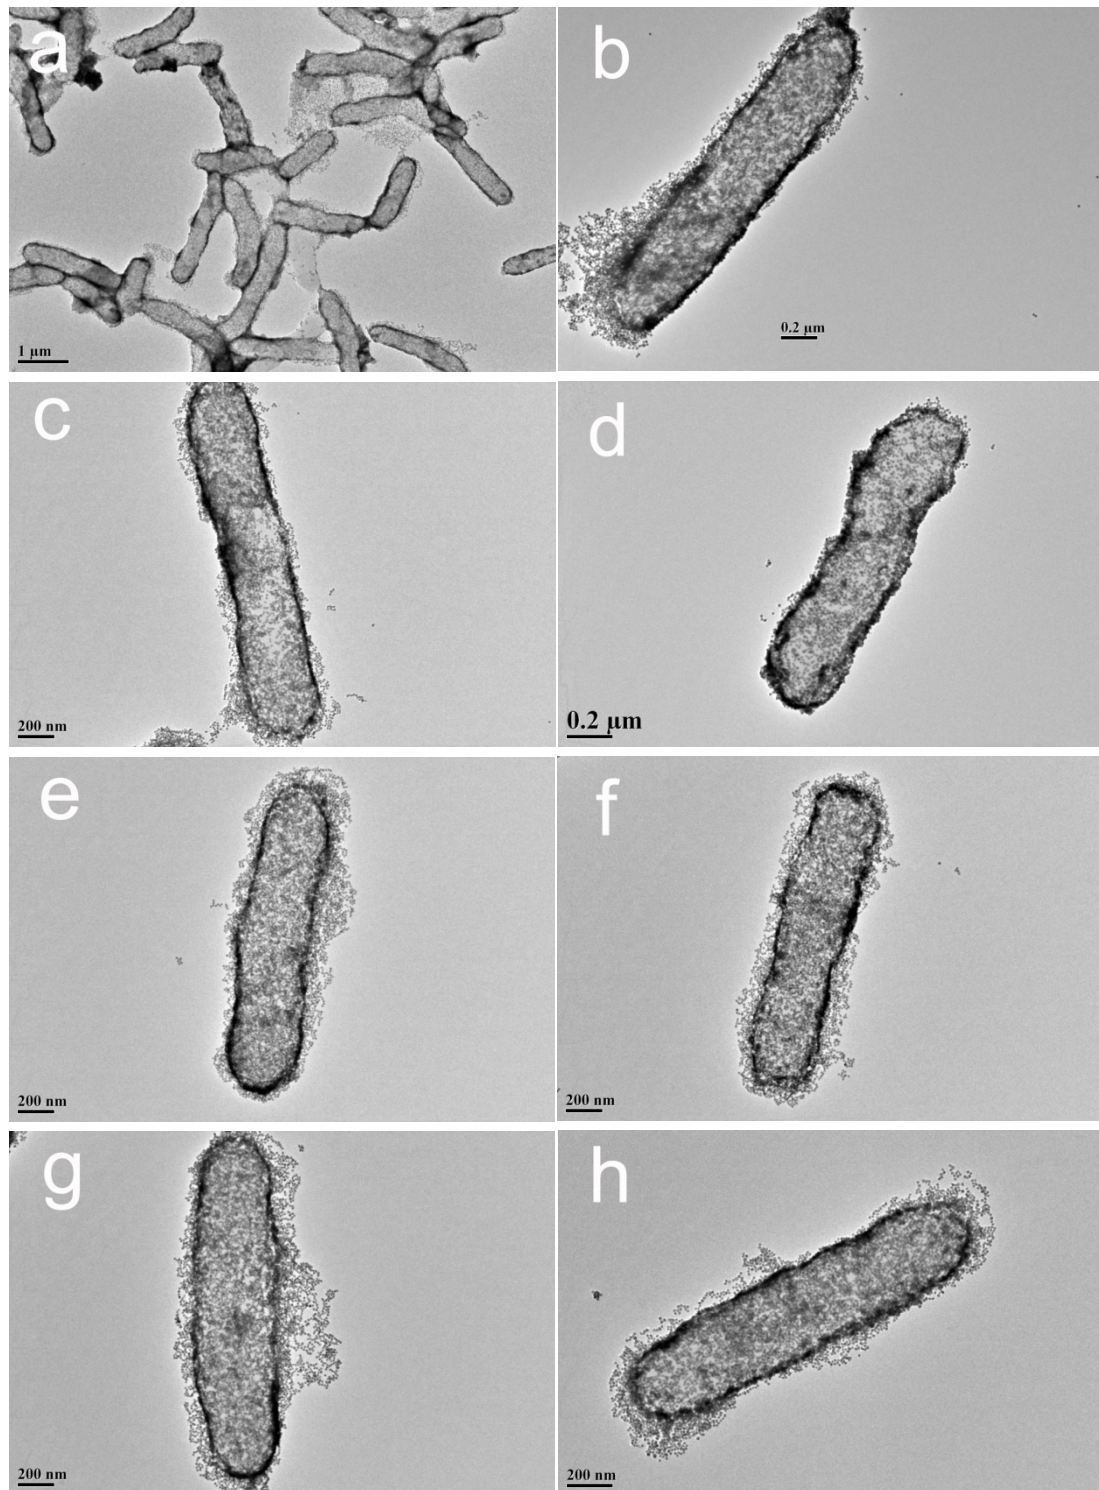

**Figure S1** Transmission electron microscopy images of AuNPs/bacteria complex. The AuNPs/bacterial complex was prepared by incubation bacterail  $1 \times 10^6$  (a&b),  $1 \times 10^5$  (c&d),  $1 \times 10^4$ , (e&f) or  $1 \times 10^3$  cfu/mL (g&h) with excess AuNPs.

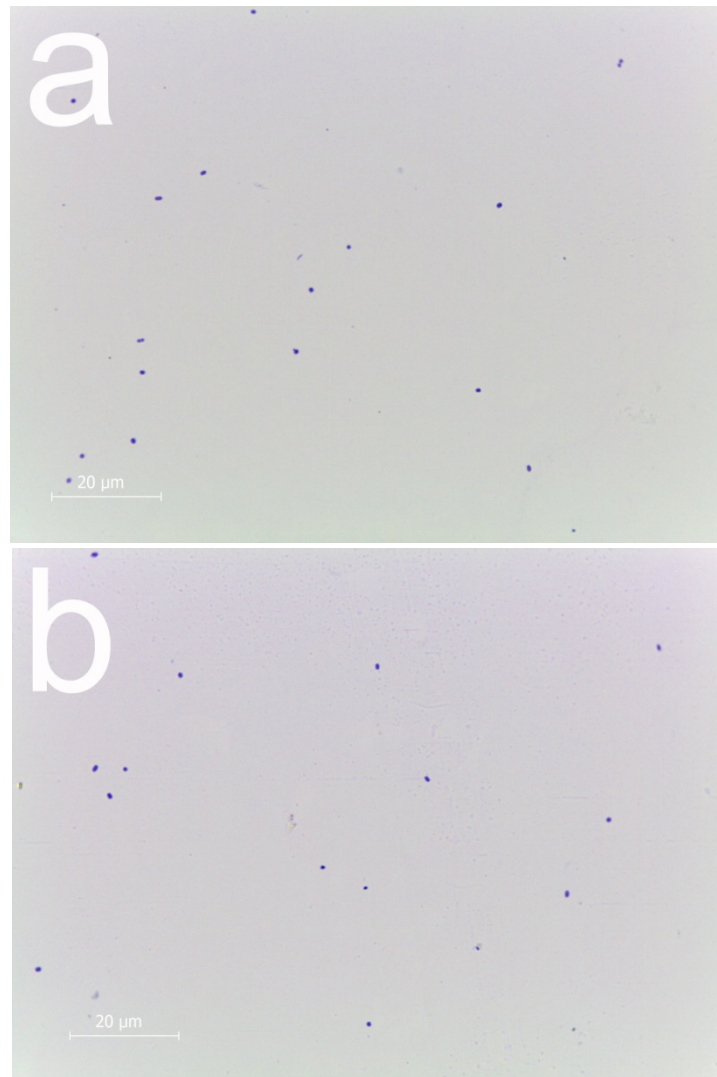

**Figure S2** Optical microscope images of *E. coli* O157:H7 captured on the sensor surface before (a) and after (b) immersing in AuNPs solution.  $1 \times 10^6$  cfu/mL bacterial sample was used to form bacterial-captured sensor surface. The bacterial was label with crystal violet before imaging.
